# Supplementary material for: Modelling the impact and cost-effectiveness of the HIV intervention programme amongst commercial sex workers in Ahmedabad, Gujarat, India
Source: PubMed Central journal article supplement (PMC1999496; doi:10.1186/1471-2458-7-195), 2007-08-06
Supplement: 1471-2458-7-195-S1.pdf [file 1471-2458-7-195-S1.pdf]

## Appendix 1: Table A1 and Table A2

**Table A1:** Comparisons between the designs of the 1999 and 2003 surveys (adapted from [1])

|                                                             | 1999                                                                     | 2003                                                                     |
|-------------------------------------------------------------|--------------------------------------------------------------------------|--------------------------------------------------------------------------|
| Total number of CSWs who have rapport with Jyoti Sangh      | 400-800 CSWs                                                             | 2500-3500 CSWs                                                           |
| Study design                                                | Cross-sectional survey                                                   | Cross-sectional survey                                                   |
| Sampling method                                             | Convenience                                                              | Stratified Cluster*                                                      |
| Sampling frame (pool from which CSWs were recruited)        | 400-500 CSWs                                                             | 1011 CSWs                                                                |
| No. of CSWs recruited                                       | 314                                                                      | 385 (125 women were tested in addition to the required sample)           |
| No. of clinics run by Jyoti Sangh                           | 1                                                                        | 3                                                                        |
| No. of clinics used for data collection and their location† | 1 – Relief Road                                                          | 2- Wadj and Relief Road                                                  |
| Components of data collection                               | Behavioural data<br>Clinical data on STIs<br>Laboratory data on STIs/HIV | Behavioural data<br>Clinical data on STIs<br>Laboratory data on STIs/HIV |

CSWs: Commercial Sex Workers \* A more appropriate sampling method was adopted in the 2003 survey as the sampling universe, i.e. the number of CSWs Jyoti Sangh had rapport with, had grown since the 1999 survey. A two-stage stratified cluster sampling was employed in 2003. CSWs were categorised into 5 groups: Street CSWs who usually solicit sex on specific locations on the street (40%); Brothel based CSWs who work from lodges or brothels in groups of five or more (39%); Residential CSWs who work from home, often not full time CSWs (13%); Call girls who arrange work using their phones or mobile phones at varying locations (8%); and Mobile CSWs who are usually migrant CSWs staying in Ahmedabad for short periods of two to three months. Mobile CSWs were not included in the sample as they were less likely to have had contact with the outreach workers, making them difficult to locate and to follow up. † The clinics were the bases of the outreach workers and the nodes of the network of peer educators and the CSWs with whom they had rapport. Relief Road clinic was in the headquarter of Jyoti Sangh on Relief Road. A second clinic was opened later as a result of the development of the intervention programme.

**Table A2:** Background characteristics of the commercial sex workers in the 1999 and 2003 surveys (adapted from [1])

| Variable                               | Percentage (n=314) (1999) | Percentage (n=385) (2003) |
|----------------------------------------|---------------------------|---------------------------|
| Age*                                   |                           |                           |
| 18-25 years                            | 29.3                      | 19.2                      |
| 26-35 years                            | 44.6                      | 42.3                      |
| 36-45 years                            | 22.6                      | 33.0                      |
| 46 years and above                     | 2.8                       | 5.5                       |
| State of origin                        |                           |                           |
| Gujarat                                | 60                        | 70                        |
| West Bengal                            | 21                        | 15                        |
| Maharashtra                            | 5                         | 3                         |
| Others                                 | 14                        | 12                        |
| With whom do you live currently?       |                           |                           |
| Alone                                  | 14.0                      | 27.8                      |
| With husband                           | 53.5                      | 61.8                      |
| With employer/ in brothel              | 6.7                       | 3.6                       |
| With peers, boyfriend (not in brothel) | 8.9                       | 3.4                       |
| Others/no response                     | 16.8                      | 0.3                       |

\* Mean ages at the 1999 and 2003 surveys were 31.2 years and 33 years respectively.

1. Jyoti Sangh, Ahmedabad Municipal Corporation AIDS Control Society: **Prevalence and trend of Sexually Transmitted Infections and HIV among Female Sex Workers of Ahmedabad, Gujarat, India during 2000-2003 Executive Summary.** Ahmedabad: Jyoti Sangh and Ahmedabad Municipal Corporation AIDS Control Society; 2004.
