# Supplementary material for: Modelling the impact and cost-effectiveness of the HIV intervention programme amongst commercial sex workers in Ahmedabad, Gujarat, India
Source: PubMed Central journal article supplement (PMC1999496; doi:10.1186/1471-2458-7-195), 2007-08-06
Supplement: 1471-2458-7-195-S4.pdf [file 1471-2458-7-195-S4.pdf]

#### Appendix 4: Assumption used in the calculation of the DALYs

The calculation of the DALYs uses the methodology described in [1]. These are crude estimates based on a scenario that a person will live for 20 years with the infection.

The following assumptions were used to estimate the DALY saved per HIV infection prevented:

| Item                            | Assumed value | Source/ note                                                           |
|---------------------------------|---------------|------------------------------------------------------------------------|
| Age at death                    | 45            | [2] Low side estimate                                                  |
| Life expectancy at age of death | 25            | [2] Life expectancy at age of death assumed = life expectancy at birth |
| Discount rate                   | 0.03          | [1]                                                                    |
| Age weight                      | 0.04          | [1]                                                                    |
| Disability weight (HIV)         | 0.233         | [2]                                                                    |
| Duration of disability (HIV)    | 2 years       | Assumption based on knowledge of disease progression [3]               |
| Disability weight (AIDS)        | 0.505         | [2]                                                                    |
| Duration of disability (AIDS)   | 18 years      | Assumption based on knowledge of disease progression [3]               |
| Age at onset                    | 25            | Assumption                                                             |

1. Fox-Rushby J, Hanson K: **Calculating and presenting disability adjusted life years (DALYs) in cost-effectiveness analysis.** *Health Policy and Planning* 2001, **16**:326-331.
2. Mathers CD, Lopez AD, Murray CJL: **The Burden of Disease and Mortality by Condition: Data, Methods, and Results for 2001.** In: *Global Burden of Disease and Risk Factors* Edited by Lopez A, Mathers C, Ezzati M, Jamison D, Murray C. New York: Oxford University Press.; 2006.
3. Bertozzi S, Padian N, Wegbreit J, DeMaria L, Feldman B, Gayle HG, J, Grant R, Isbell M: **HIV/AIDS Prevention and Treatment.** In: *Disease control priorities in developing countries* Edited by Jamison D, Breman J, Measham A, Alleyne G, Claeson M, Evans D, Jha P, Mills A, Musgrove P. New York: Oxford University Press; 2006.
